# Supplementary material for: Artisanal Goat Coalho Cheese with Cachaça as Flavoring Agent
Source: MDPI journal article supplement (doi:10.3390/foods12101945), 2023-05-10
Supplement: s1 [file s1]

# Artisanal goat *coalho* cheese with cachaça as flavoring agent

Iuri Rosario, Carla Vieira, Luana Barreto, Nathália Monteiro, Rodrigo Moreira, Ana Paula Salim, Carini Lelis, Manuela Solca, Sergio Mano, Carlos Conte-Junior and Marion Costa

**Table S1.** Pearson's correlation test between microbial count and physicochemical parameters in artisanal goat *coalho* cheeses immersed in cachaça and stored at 4 °C during 60 days.

| Parameter          | Variable                | r             | p       |
|--------------------|-------------------------|---------------|---------|
| Storage period     | LAB                     | <b>0.958</b>  | <0.0001 |
|                    | <i>Lactococcus</i> spp. | <b>0.932</b>  | <0.0001 |
|                    | pH                      | -0.310        | 0.108   |
|                    | <i>L</i> *              | <b>-0.747</b> | <0.0001 |
|                    | <i>a</i> *              | -0.192        | 0.328   |
|                    | <i>b</i> *              | 0.506         | 0.006   |
|                    | <i>C</i> *              | 0.501         | 0.007   |
|                    | <i>h</i> °              | 0.314         | 0.104   |
|                    | Hardness                | 0.265         | 0.173   |
|                    | Cohesiveness            | -0.121        | 0.541   |
|                    | Gumminess               | 0.297         | 0.125   |
|                    | Chewiness               | -0.113        | 0.567   |
| LAB                | Storage period          | <b>0.958</b>  | <0.0001 |
|                    | <i>Lactococcus</i> spp. | <b>0.937</b>  | <0.0001 |
|                    | pH                      | 0.357         | 0.062   |
|                    | <i>L</i> *              | <b>-0.733</b> | <0.0001 |
|                    | <i>a</i> *              | -0.050        | 0.800   |
|                    | <i>b</i> *              | 0.522         | 0.004   |
|                    | <i>C</i> *              | 0.519         | 0.005   |
|                    | <i>h</i> °              | 0.166         | 0.400   |
|                    | Hardness                | 0.101         | 0.608   |
|                    | Cohesiveness            | -0.031        | 0.875   |
|                    | Gumminess               | 0.229         | 0.241   |
|                    | Chewiness               | -0.116        | 0.557   |
| <i>Lactococcus</i> | Storage period          | <b>0.932</b>  | <0.0001 |
|                    | LAB                     | <b>0.937</b>  | <0.0001 |
|                    | pH                      | 0.356         | 0.063   |
|                    | <i>L</i> *              | <b>-0.723</b> | <0.0001 |
|                    | <i>a</i> *              | -0.130        | 0.510   |
|                    | <i>b</i> *              | 0.470         | 0.012   |
|                    | <i>C</i> *              | 0.466         | 0.012   |
|                    | <i>h</i> °              | 0.240         | 0.219   |

|       |                         |               |         |
|-------|-------------------------|---------------|---------|
|       | Hardness                | 0.062         | 0.755   |
|       | Cohesiveness            | -0.021        | 0.916   |
|       | Gumminess               | 0.268         | 0.168   |
|       | Chewiness               | -0.146        | 0.459   |
| pH    | Storage period          | -0.310        | 0.108   |
|       | LAB                     | 0.357         | 0.062   |
|       | <i>Lactococcus</i> spp. | 0.356         | 0.063   |
|       | $L^*$                   | -0.553        | 0.002   |
|       | $a^*$                   | -0.140        | 0.477   |
|       | $b^*$                   | 0.170         | 0.387   |
|       | $C^*$                   | 0.166         | 0.399   |
|       | $h^\circ$               | 0.180         | 0.360   |
|       | Hardness                | -0.148        | 0.452   |
|       | Cohesiveness            | 0.646         | 0.0002  |
|       | Gumminess               | 0.367         | 0.055   |
|       | Chewiness               | 0.229         | 0.241   |
| $L^*$ | Storage period          | <b>-0.747</b> | <0.0001 |
|       | LAB                     | <b>-0.733</b> | <0.0001 |
|       | <i>Lactococcus</i> spp. | <b>-0.723</b> | <0.0001 |
|       | pH                      | -0.553        | 0.002   |
|       | $a^*$                   | 0.053         | 0.787   |
|       | $b^*$                   | -0.627        | 0.001   |
|       | $C^*$                   | -0.625        | 0.001   |
|       | $h^\circ$               | -0.196        | 0.319   |
|       | Hardness                | -0.197        | 0.315   |
|       | Cohesiveness            | -0.205        | 0.296   |
|       | Gumminess               | -0.634        | 0.001   |
|       | Chewiness               | -0.256        | 0.189   |
| $a^*$ | Storage period          | -0.192        | 0.328   |
|       | LAB                     | -0.050        | 0.780   |
|       | <i>Lactococcus</i> spp. | -0.130        | 0.510   |
|       | pH                      | -0.192        | 0.328   |
|       | $L^*$                   | 0.053         | 0.787   |
|       | $b^*$                   | 0.416         | 0.028   |
|       | $C^*$                   | 0.426         | 0.024   |
|       | $h^\circ$               | <b>-0.979</b> | <0.0001 |
|       | Hardness                | -0.205        | 0.295   |
|       | Cohesiveness            | 0.270         | 0.166   |
|       | Gumminess               | -0.235        | 0.229   |
|       | Chewiness               | 0.169         | 0.391   |
| $b^*$ | Storage period          | 0.506         | 0.006   |
|       | LAB                     | 0.522         | 0.004   |
|       | <i>Lactococcus</i> spp. | 0.470         | 0.012   |
|       | pH                      | 0.170         | 0.387   |
|       | $L^*$                   | -0.627        | 0.001   |
|       | $a^*$                   | 0.417         | 0.023   |
|       | $C^*$                   | <b>0.999</b>  | <0.0001 |
|       | $h^\circ$               | -0.232        | 0.235   |

|              |                         |              |         |
|--------------|-------------------------|--------------|---------|
|              | Hardness                | 0.005        | 0.980   |
|              | Cohesiveness            | 0.050        | 0.801   |
|              | Gumminess               | 0.152        | 0.442   |
|              | Chewiness               | -0.011       | 0.957   |
| C*           | Storage period          | 0.501        | 0.007   |
|              | LAB                     | 0.519        | 0.005   |
|              | <i>Lactococcus</i> spp. | 0.466        | 0.012   |
|              | pH                      | 0.166        | 0.399   |
|              | L*                      | -0.625       | 0.001   |
|              | a*                      | 0.426        | 0.024   |
|              | b*                      | <b>0.999</b> | <0.0001 |
|              | h°                      | -0.243       | 0.213   |
|              | Hardness                | 0.004        | 0.982   |
|              | Cohesiveness            | 0.053        | 0.788   |
|              | Gumminess               | 0.152        | 0.440   |
|              | Chewiness               | -0.005       | 0.982   |
| h°           | Storage period          | 0.314        | 0.104   |
|              | LAB                     | 0.166        | 0.400   |
|              | <i>Lactococcus</i> spp. | 0.240        | 0.219   |
|              | pH                      | 0.180        | 0.360   |
|              | L*                      | -0.195       | 0.319   |
|              | a*                      | -0.979       | <0.0001 |
|              | b*                      | -0.232       | 0.235   |
|              | C*                      | -0.243       | 0.213   |
|              | Hardness                | 0.214        | 0.273   |
|              | Cohesiveness            | -0.283       | 0.144   |
|              | Gumminess               | 0.278        | 0.152   |
|              | Chewiness               | -0.195       | 0.320   |
| Hardness (g) | Storage period          | 0.265        | 0.173   |
|              | LAB                     | 0.101        | 0.608   |
|              | <i>Lactococcus</i> spp. | 0.062        | 0.755   |
|              | pH                      | -0.148       | 0.452   |
|              | L*                      | -0.197       | 0.315   |
|              | a*                      | -0.205       | 0.295   |
|              | b*                      | 0.005        | 0.980   |
|              | C*                      | 0.004        | 0.982   |
|              | h°                      | 0.214        | 0.273   |
|              | Cohesiveness            | -0.456       | 0.015   |
|              | Gumminess               | 0.437        | 0.020   |
|              | Chewiness               | 0.206        | 0.294   |
| Cohesiveness | Storage period          | -0.121       | 0.541   |
|              | LAB                     | -0.031       | 0.875   |
|              | <i>Lactococcus</i> spp. | -0.021       | 0.916   |
|              | pH                      | 0.646        | 0.0002  |
|              | L*                      | -0.205       | 0.296   |
|              | a*                      | 0.270        | 0.166   |
|              | b*                      | 0.050        | 0.801   |
|              | C*                      | 0.053        | 0.788   |

|               |                         |              |         |
|---------------|-------------------------|--------------|---------|
|               | $h^{\circ}$             | -0.283       | 0.144   |
|               | Hardness                | -0.456       | 0.015   |
|               | Gumminess               | 0.355        | 0.064   |
|               | Chewiness               | 0.607        | 0.001   |
| Gumminess (g) | Storage period          | 0.297        | 0.125   |
|               | LAB                     | 0.229        | 0.241   |
|               | <i>Lactococcus</i> spp. | 0.268        | 0.168   |
|               | pH                      | 0.367        | 0.055   |
|               | $L^*$                   | -0.634       | 0.001   |
|               | $a^*$                   | -0.235       | 0.229   |
|               | $b^*$                   | 0.152        | 0.442   |
|               | $C^*$                   | 0.152        | 0.440   |
|               | $h^{\circ}$             | 0.278        | 0.152   |
|               | Hardness                | 0.437        | 0.020   |
|               | Cohesiveness            | 0.355        | 0.064   |
|               | Chewiness               | <b>0.755</b> | <0.0001 |
| Chewiness (g) | Storage period          | -0.113       | 0.567   |
|               | LAB                     | -0.116       | 0.557   |
|               | <i>Lactococcus</i> spp. | -0.146       | 0.459   |
|               | pH                      | 0.229        | 0.241   |
|               | $L^*$                   | -0.256       | 0.189   |
|               | $a^*$                   | 0.169        | 0.391   |
|               | $b^*$                   | -0.011       | 0.957   |
|               | $C^*$                   | -0.005       | 0.982   |
|               | $h^{\circ}$             | -0.195       | 0.320   |
|               | Hardness                | 0.206        | 0.294   |
|               | Cohesiveness            | 0.607        | 0.001   |
|               | Gumminess               | <b>0.755</b> | <0.0001 |

LAB: lactic acid bacteria;  $L^*$ : lightness;  $a^*$ : redness;  $b^*$ : yellowness;  $C^*$ : chroma;  $h^{\circ}$ : hue angle; r: Pearson's correlation coefficient;  $p$ : probability value. Values in bold indicate strong ( $\geq 0.7$ ) correlation between the variables.

**Table S2.** Pearson's correlation test between microbial and physicochemical variables with sensory quality scores in artisanal goat *coalho* cheeses immersed in cachaça and stored at 4 °C.

| Sensory parameter | Variable           | R             | p     |
|-------------------|--------------------|---------------|-------|
| Appearance        | LAB                | <b>-0.957</b> | 0.043 |
|                   | <i>Lactococcus</i> | -0.024        | 0.976 |
|                   | <i>L</i> *         | -0.013        | 0.987 |
|                   | <i>b</i> *         | -0.794        | 0.206 |
|                   | <i>a</i> *         | <b>-0.971</b> | 0.029 |
|                   | <i>C</i> *         | -0.804        | 0.196 |
|                   | <i>h</i> °         | 0.919         | 0.081 |
|                   | Hardness           | -0.241        | 0.759 |
|                   | Cohesiveness       | 0.234         | 0.766 |
|                   | Gumminess          | 0.249         | 0.751 |
|                   | Chewiness          | 0.761         | 0.239 |
| Color             | LAB                | <b>-0.954</b> | 0.047 |
|                   | <i>Lactococcus</i> | -0.018        | 0.982 |
|                   | <i>L</i> *         | 0.031         | 0.969 |
|                   | <i>b</i> *         | -0.823        | 0.177 |
|                   | <i>a</i> *         | <b>-0.961</b> | 0.039 |
|                   | <i>C</i> *         | -0.832        | 0.168 |
|                   | <i>h</i> °         | 0.900         | 0.100 |
|                   | Hardness           | -0.219        | 0.781 |
|                   | Cohesiveness       | 0.209         | 0.791 |
|                   | Gumminess          | 0.222         | 0.778 |
|                   | Chewiness          | 0.785         | 0.215 |
| Aroma             | LAB                | -0.687        | 0.313 |
|                   | <i>Lactococcus</i> | -0.529        | 0.471 |
|                   | <i>L</i> *         | 0.093         | 0.907 |
|                   | <i>b</i> *         | -0.555        | 0.445 |
|                   | <i>a</i> *         | -0.784        | 0.217 |
|                   | <i>C</i> *         | -0.567        | 0.433 |
|                   | <i>h</i> °         | 0.746         | 0.254 |
|                   | Hardness           | 0.160         | 0.840 |
|                   | Cohesiveness       | -0.143        | 0.857 |
|                   | Gumminess          | 0.691         | 0.309 |
|                   | Chewiness          | 0.781         | 0.219 |
| Flavor            | LAB                | -0.822        | 0.178 |
|                   | <i>Lactococcus</i> | -0.338        | 0.662 |
|                   | <i>L</i> *         | -0.036        | 0.964 |
|                   | <i>b</i> *         | -0.610        | 0.390 |
|                   | <i>a</i> *         | -0.899        | 0.101 |
|                   | <i>C</i> *         | -0.623        | 0.377 |
|                   | <i>h</i> °         | 0.871         | 0.129 |
|                   | Hardness           | -0.049        | 0.951 |
|                   | Cohesiveness       | 0.062         | 0.938 |
|                   | Gumminess          | 0.571         | 0.429 |
|                   | Chewiness          | 0.742         | 0.259 |

|                    |                       |        |       |
|--------------------|-----------------------|--------|-------|
| Texture            | LAB                   | -0.743 | 0.257 |
|                    | <i>Lactococcus</i>    | -0.034 | 0.966 |
|                    | <i>L*</i>             | -0.650 | 0.350 |
|                    | <i>b*</i>             | -0.160 | 0.840 |
|                    | <i>a*</i>             | -0.837 | 0.164 |
|                    | <i>C*</i>             | -0.176 | 0.824 |
|                    | <i>h</i> <sup>°</sup> | 0.915  | 0.085 |
|                    | Hardness              | -0.530 | 0.470 |
|                    | Cohesiveness          | 0.564  | 0.436 |
|                    | Gumminess             | 0.495  | 0.506 |
|                    | Chewiness             | 0.173  | 0.827 |
| Overall impression | LAB                   | -0.867 | 0.133 |
|                    | <i>Lactococcus</i>    | -0.220 | 0.780 |
|                    | <i>L*</i>             | -0.208 | 0.792 |
|                    | <i>b*</i>             | -0.546 | 0.454 |
|                    | <i>a*</i>             | -0.942 | 0.058 |
|                    | <i>C*</i>             | -0.560 | 0.440 |
|                    | <i>h</i> <sup>°</sup> | 0.939  | 0.061 |
|                    | Hardness              | -0.219 | 0.782 |
|                    | Cohesiveness          | 0.235  | 0.765 |
|                    | Gumminess             | 0.529  | 0.471 |
|                    | Chewiness             | 0.624  | 0.376 |
| Purchase intention | LAB                   | -0.695 | 0.305 |
|                    | <i>Lactococcus</i>    | -0.207 | 0.793 |
|                    | <i>L*</i>             | -0.561 | 0.439 |
|                    | <i>b*</i>             | -0.153 | 0.847 |
|                    | <i>a*</i>             | -0.811 | 0.190 |
|                    | <i>C*</i>             | -0.170 | 0.830 |
|                    | <i>h</i> <sup>°</sup> | 0.882  | 0.118 |
|                    | Hardness              | -0.374 | 0.626 |
|                    | Cohesiveness          | 0.413  | 0.587 |
|                    | Gumminess             | 0.633  | 0.367 |
|                    | Chewiness             | 0.251  | 0.750 |

LAB: lactic acid bacteria; *L\**: lightness; *a\**: redness; *b\**: yellowness; *C\**: chroma; *h*<sup>°</sup>: hue angle; r: Pearson's correlation coefficient; *p*: probability value. Values in bold indicate strong ( ≥ 0.7) correlation between the variables.
